# Supplementary material for: Bean and Pea Plastoglobules Change in Response to Chilling Stress
Source: MDPI journal article supplement (doi:10.3390/ijms222111895), 2021-11-02
Supplement: s1 [file s1]

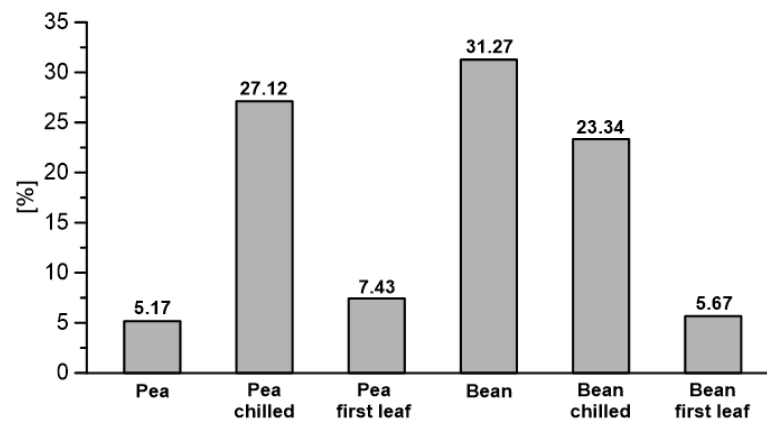

**Figure S1.** The amount of plastoglobules measured from TEM images, presented as percentage distribution from all analyzed variants, total counts= 2400 PGs.

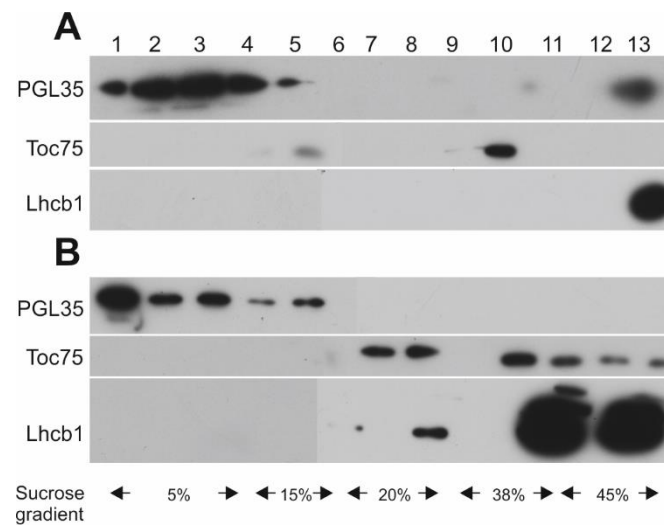

**Figure S2.** Immunoblot analysis of chloroplast membrane fractions isolated from pea (*Pisum sativum*) and bean (*Phaseolus coccineus*) plants in control conditions. Chloroplast membranes were separated by ultracentrifugation on a sucrose gradient. Fractions of 2 mL were collected from the top (fraction 1 in 5% sucrose) to the bottom (fraction 13 in 45% sucrose) of the sucrose gradient. Proteins from 400  $\mu$ L aliquots of the even fractions 1-13 were precipitated, separated by SDS-PAGE, and transferred to a PVDF membrane. The membrane was sequentially probed with antibodies raised against membrane marker proteins: PGL35 (plastoglobule protein), Toc75 (outer envelope membrane protein), and Lhcb1 (thylakoid protein). Gels were scanned using C-DiGit Blot Scanner (Li-COR Biosciences, Lincoln, Nebraska, USA) in a resolution of 300 dpi and TIFF format.

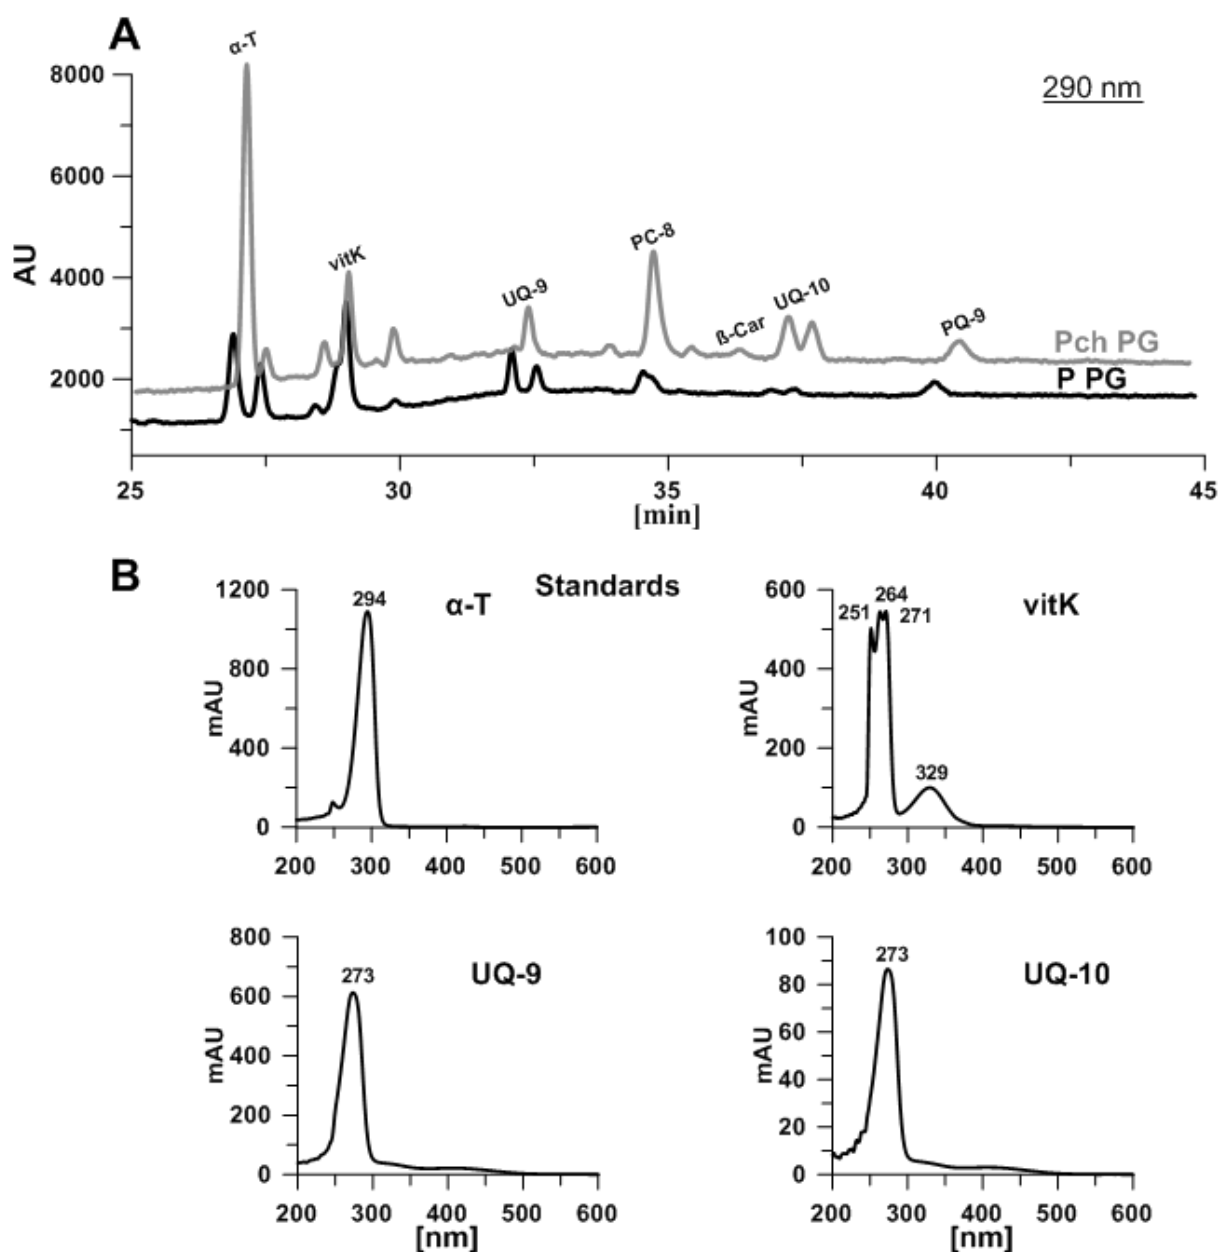

**Figure S3.** Prenyllipid and carotenoid profiling in PGs. (A) Identification of peaks present in chromatograms of PG extracts from pea control and chilled plants as an example. Abundant peaks were indicated by abbreviations as follows:  $\alpha$ -T-  $\alpha$ -Tocopherol, vitK- Phyloquinone, UQ-9- Ubiquinone-9, PC-8- Plastochromanol-8,  $\beta$ -Car-  $\beta$ -carotene, UQ-10- Ubiquinone-10, PQ-9- Plastoquinone-9. (B) Pigments and prenllipids were identified by retention time [1,2] characteristic UV absorption spectrum [3] and compared to applied standards. The  $\alpha$ -tocopherol ( $\alpha$ -T), phyloquinone (vitK), coenzyme Q<sub>9</sub> and coenzyme Q<sub>10</sub> (ubiquinone-9 and ubiquinone-10, respectively) standards of HPLC grade ( $\geq 99.5\%$ ) were obtained from Sigma-Aldrich.

**Table S1.** List of primers used in this research.

| Name                         | Forward sequence 5'→ 3'  | Reverse sequence 5'→ 3'    |
|------------------------------|--------------------------|----------------------------|
| <b>PP2A</b> ( <i>pea</i> )   | TGATCAAGTGAAGATGTCCAGCTA | GCAAAGCAGGATCTCAACAA-TAACT |
| <b>TUB1</b> ( <i>pea</i> )   | ATTCTCTGAGGCTCGTGAGG     | AAAAGCACATTGCACAACACAAA    |
| <b>PGL35</b> ( <i>pea</i> )  | TGAGGTGTCCGAGTTTGTGG     | TGTGTACAGCAGCACCCAAT       |
| <b>AOS</b> ( <i>pea</i> )    | TGACTCCGGCGATCAAACAG     | AGAATTGGACCGAGCTGACG       |
| <b>VTE1</b> ( <i>pea</i> )   | TTCATGGTGTATTGAGCACGC    | ACTGCATGCGGAAGCTCAAG       |
| <b>Act11</b> ( <i>bean</i> ) | CTGGCCTACATTGCCCTTGA     | CTGTCCATCAGGCAACTCGT       |
| <b>Tub8</b> ( <i>bean</i> )  | ATGAGGAGGAAATTGCACCA     | TTACACCACTCGTTCAAAGCC      |
| <b>PGL35</b> ( <i>bean</i> ) | CCGTCCCCGTCTCCTAAGAA     | GGGTTGACACTGTCTTTCCGA      |
| <b>AOS</b> ( <i>bean</i> )   | CACGCGTCCGAGTTACTTTT     | GAGGCTCCCAGAACTTGCTT       |
| <b>VTE1</b> ( <i>bean</i> )  | AAGAGGGTGGGGATAACAGC     | GATGCCAGATCCACCCAGG        |

## References

1. Martinis, J.; Kessler, F.; Glauser, G. A novel method for prenylquinone profiling in plant tissues by ultra-high pressure liquid chromatography-mass spectrometry. *Plant Methods* **2011**, *7*, doi:10.1186/1746-4811-7-23.
2. Kessler, F.; Glauser, G. Prenylquinone Profiling in Whole Leaves and Chloroplast Subfractions. *Plant Isoprenoids: Methods and Protocols* **2014**, *1153*, 213-226, doi:10.1007/978-1-4939-0606-2\_15.
3. Fraser, P.D.; Pinto, M.E.S.; Holloway, D.E.; Bramley, P.M. Application of high-performance liquid chromatography with photodiode array detection to the metabolic profiling of plant isoprenoids. *Plant Journal* **2000**, *24*, 551-558, doi:10.1111/j.1365-313X.2000.00896.x.
